# Supplementary material
Source: PubMed Central journal article supplement (PMC5669454)
Supplement: NIHMS72872-supplement-ESM1.pdf [file NIHMS72872-supplement-ESM1.pdf]

Supplementary Table 1. Length at birth, and conditional growth in height explaining femoral neck bone area, bone mineral content (BMC), and areal bone mineral density (aBMD) in a subgroup of women (n=178) from the Helsinki Birth Cohort Study.

|                                  | Model 1 |             |       | Model 2 |            |       |
|----------------------------------|---------|-------------|-------|---------|------------|-------|
|                                  | B       | 95% CI      | p     | B       | 95% CI     | p     |
| <b>Bone area, cm<sup>2</sup></b> |         |             |       |         |            |       |
| Birth                            | 0.05    | -0.02;0.13  | 0.185 | 0.002   | -0.08;0.08 | 0.958 |
| 0 to 2 years                     | 0.091   | 0.03;0.15   | 0.002 | 0.033   | -0.04;0.11 | 0.363 |
| 2 to 7 years                     | 0.045   | -0.01;0.10  | 0.135 | -0.003  | -0.07;0.07 | 0.922 |
| 7 to 11 years                    | 0.001   | -0.05;0.05  | 0.978 | -0.014  | -0.07;0.04 | 0.599 |
| Early old age                    |         |             |       | 0.113   | 0.03;0.2   | 0.011 |
| <b>BMC, g</b>                    |         |             |       |         |            |       |
| Birth                            | 0.057   | -0.10;0.21  | 0.464 | -0.001  | -0.17;0.17 | 0.995 |
| 0 to 2 years                     | 0.176   | 0.06;0.30   | 0.004 | 0.106   | -0.04;0.26 | 0.165 |
| 2 to 7 years                     | 0.146   | 0.03;0.27   | 0.018 | 0.088   | -0.06;0.23 | 0.224 |
| 7 to 11 years                    | 0.063   | -0.04;0.17  | 0.247 | 0.045   | -0.06;0.16 | 0.411 |
| Early old age                    |         |             |       | 0.135   | -0.05;0.32 | 0.142 |
| <b>aBMD, g/cm<sup>2</sup></b>    |         |             |       |         |            |       |
| Birth                            | 0.003   | -0.03;0.03  | 0.856 | -0.001  | -0.03;0.03 | 0.95  |
| 0 to 2 years                     | 0.018   | -0.003;0.04 | 0.096 | 0.014   | -0.01;0.04 | 0.319 |
| 2 to 7 years                     | 0.022   | 0.00;0.04   | 0.047 | 0.018   | -0.01;0.04 | 0.159 |
| 7 to 11 years                    | 0.013   | -0.01;0.03  | 0.180 | 0.012   | -0.01;0.03 | 0.230 |
| Early old age                    |         |             |       | 0.008   | -0.02;0.04 | 0.618 |

B, unstandardized regression coefficient. B describes increase in the outcome variable per 1-SD greater growth.

Both models are adjusted for length of gestation, age, years since menopause, childhood and adulthood socio-economic status, alcohol intake, smoking, exercise, and estrogen replacement therapy.

Model 1 excludes and Model 2 includes body size at early old age.
