# Supplementary material
Source: PubMed Central journal article supplement (PMC5669454)
Supplement: NIHMS72872-supplement-ESM2.pdf [file NIHMS72872-supplement-ESM2.pdf]

Supplementary Table 2. Birth weight, and conditional growth in weight explaining femoral neck bone area, bone mineral content (BMC), and areal bone mineral density (aBMD) in early old age in a subgroup of women (n=178) from the Helsinki Birth Cohort Study.

|                                  | Model 1 |            |       | Model 2 |            |        |
|----------------------------------|---------|------------|-------|---------|------------|--------|
|                                  | B       | 95% CI     | p     | B       | 95% CI     | p      |
| <b>Bone area, cm<sup>2</sup></b> |         |            |       |         |            |        |
| Birth                            | 0.041   | -0.02;0.10 | 0.196 | 0.036   | -0.03;0.10 | 0.262  |
| 0 to 2 years                     | 0.026   | -0.04;0.09 | 0.402 | 0.016   | -0.05;0.08 | 0.615  |
| 2 to 7 years                     | 0.032   | -0.03;0.09 | 0.297 | 0.026   | -0.04;0.09 | 0.411  |
| 7 to 11 years                    | 0.001   | -0.06;0.06 | 0.972 | -0.001  | -0.06;0.06 | 0.983  |
| Early old age                    |         |            |       | 0.060   | 0.00;0.12  | 0.067  |
| <b>BMC, g</b>                    |         |            |       |         |            |        |
| Birth                            | -0.011  | -0.14;0.12 | 0.867 | -0.037  | -0.16;0.09 | 0.552  |
| 0 to 2 years                     | 0.091   | -0.04;0.22 | 0.156 | 0.044   | -0.08;0.16 | 0.473  |
| 2 to 7 years                     | 0.067   | -0.06;0.20 | 0.298 | 0.035   | -0.09;0.16 | 0.565  |
| 7 to 11 years                    | 0.001   | -0.13;0.13 | 0.994 | -0.008  | -0.13;0.11 | 0.901  |
| Early old age                    |         |            |       | 0.275   | 0.15;0.40  | <0.001 |
| <b>aBMD, g/cm<sup>2</sup></b>    |         |            |       |         |            |        |
| Birth                            | -0.011  | -0.03;0.01 | 0.329 | -0.016  | -0.04;0.01 | 0.154  |
| 0 to 2 years                     | 0.012   | -0.01;0.03 | 0.296 | 0.004   | -0.02;0.03 | 0.731  |
| 2 to 7 years                     | 0.008   | -0.01;0.03 | 0.470 | 0.003   | -0.02;0.02 | 0.800  |
| 7 to 11 years                    | -0.001  | -0.02;0.02 | 0.925 | -0.002  | -0.02;0.02 | 0.821  |
| Early old age                    |         |            |       | 0.046   | 0.02;0.07  | <0.001 |

B, unstandardized regression coefficient. B describes increase in the outcome variable per 1-SD greater growth.

Both models are adjusted for length of gestation, age, years since menopause, childhood and adulthood socio-economic status, alcohol intake, smoking, exercise, and estrogen replacement therapy.

Model 1 excludes and Model 2 includes body size at early old age.
