# Supplementary material
Source: PubMed Central journal article supplement (PMC5669454)
Supplement: NIHMS72872-supplement-ESM3.pdf [file NIHMS72872-supplement-ESM3.pdf]

Supplementary Table 3. Length at birth and conditional growth in height explaining spine (L2-L4) bone area, bone mineral content (BMC), and areal bone mineral density (aBMD) in early old age in a subgroup of women (n=178) from the Helsinki Birth Cohort Study.

|                                  | Model 1 |            |        | Model 2 |            |        |
|----------------------------------|---------|------------|--------|---------|------------|--------|
|                                  | B       | 95% CI     | p      | B       | 95% CI     | p      |
| <b>Bone area, cm<sup>2</sup></b> |         |            |        |         |            |        |
| Birth                            | 1.09    | 0.58;1.60  | >0.001 | 0.37    | -0.16;0.89 | 0.17   |
| 0 to 2 years                     | 1.53    | 1.05;2.01  | >0.001 | 0.53    | -0.03;1.09 | 0.062  |
| 2 to 7 years                     | 0.81    | 0.32;1.29  | 0.001  | -0.11   | -0.65;0.43 | 0.683  |
| 7 to 11 years                    | 0.67    | 0.19;1.15  | 0.006  | 0.64    | 0.21;1.07  | 0.004  |
| Early old age                    |         |            |        | 1.99    | 1.30;2.67  | >0.001 |
| <b>BMC, g</b>                    |         |            |        |         |            |        |
| Birth                            | 1.76    | 0.08;3.45  | 0.04   | 0.61    | -1.27;2.49 | 0.521  |
| 0 to 2 years                     | 2.54    | 0.95;4.13  | 0.002  | 0.93    | -1.06;2.93 | 0.356  |
| 2 to 7 years                     | 2.15    | 0.54;3.75  | 0.009  | 0.68    | -1.27;2.62 | 0.492  |
| 7 to 11 years                    | 1.20    | -0.38;2.78 | 0.136  | 1.15    | -0.41;2.71 | 0.146  |
| Early old age                    |         |            |        | 3.18    | 0.72;5.63  | 0.012  |
| <b>aBMD, g/cm<sup>2</sup></b>    |         |            |        |         |            |        |
| Birth                            | 0.013   | -0.02;0.05 | 0.427  | 0.005   | -0.03;0.04 | 0.778  |
| 0 to 2 years                     | 0.017   | -0.01;0.05 | 0.261  | 0.007   | -0.03;0.05 | 0.738  |
| 2 to 7 years                     | 0.026   | -0.01;0.06 | 0.095  | 0.016   | -0.02;0.05 | 0.398  |
| 7 to 11 years                    | 0.008   | -0.02;0.04 | 0.587  | 0.008   | -0.02;0.04 | 0.603  |
| Early old age                    |         |            |        | 0.021   | -0.03;0.07 | 0.379  |

B, unstandardized regression coefficient. B describes increase in the outcome variable per 1-SD greater growth.

Both models are adjusted for length of gestation, age, years since menopause, childhood and adulthood socio-economic status, alcohol intake, smoking, exercise, and estrogen replacement therapy.

Model 1 excludes and Model 2 includes body size at early old age.
