# Supplementary material
Source: PubMed Central journal article supplement (PMC5669454)
Supplement: NIHMS72872-supplement-ESM4.pdf [file NIHMS72872-supplement-ESM4.pdf]

Supplementary Table 4. Relative birth weight and conditional growth in weight explaining spine (L2-L4) bone area, bone mineral content (BMC), and areal bone mineral density (aBMD) in early old age in a subgroup of women (n=178) from the Helsinki Birth Cohort Study

|                                  | Model 1 |            |       | Model 2 |            |        |
|----------------------------------|---------|------------|-------|---------|------------|--------|
|                                  | B       | 95% CI     | p     | B       | 95% CI     | p      |
| <b>Bone area, cm<sup>2</sup></b> |         |            |       |         |            |        |
| Birth                            | -0.207  | -0.79;0.38 | 0.487 | -0.302  | -0.87;0.26 | 0.293  |
| 0 to 2 years                     | -0.306  | -0.89;0.28 | 0.303 | -0.409  | -0.97;0.16 | 0.154  |
| 2 to 7 years                     | -0.206  | -0.8;0.39  | 0.494 | -0.366  | -0.94;0.21 | 0.21   |
| 7 to 11 years                    | -0.101  | -0.69;0.49 | 0.734 | -0.243  | -0.81;0.33 | 0.4    |
| Early old age                    |         |            |       | 1.102   | 0.52;1.69  | >0.001 |
| <b>BMC, g</b>                    |         |            |       |         |            |        |
| Birth                            | 0.315   | -1.39;2.02 | 0.715 | 0.009   | -1.61;1.63 | 0.991  |
| 0 to 2 years                     | -0.271  | -1.97;1.43 | 0.753 | -0.602  | -2.22;1.02 | 0.464  |
| 2 to 7 years                     | 0.228   | -1.49;1.95 | 0.794 | -0.288  | -1.94;1.36 | 0.731  |
| 7 to 11 years                    | 0.282   | -1.42;1.99 | 0.744 | -0.174  | -1.8;1.46  | 0.834  |
| Early old age                    |         |            |       | 3.542   | 1.87;5.22  | >0.001 |
| <b>aBMD, g/cm<sup>2</sup></b>    |         |            |       |         |            |        |
| Birth                            | 0.012   | -0.02;0.04 | 0.42  | 0.008   | -0.02;0.04 | 0.594  |
| 0 to 2 years                     | 0.001   | -0.03;0.03 | 0.929 | -0.003  | -0.03;0.03 | 0.816  |
| 2 to 7 years                     | 0.011   | -0.02;0.04 | 0.474 | 0.004   | -0.03;0.03 | 0.811  |
| 7 to 11 years                    | 0.01    | -0.02;0.04 | 0.531 | 0.003   | -0.03;0.03 | 0.841  |
| Early old age                    |         |            |       | 0.052   | 0.02;0.08  | 0.001  |

B, unstandardized regression coefficient. B describes increase in the outcome variable per 1-SD greater growth.

Both models are adjusted for length of gestation, age, years since menopause, childhood and adulthood socio-economic status, alcohol intake, smoking, exercise, and estrogen replacement therapy.

Model 1 excludes and Model 2 includes body size at early old age.
